# Supplementary material
Source: Elsevier journal article supplement (https://www.sciencedirect.com/science/article/pii/S1699258X2100187X)
Supplement: mmc1 [file S1699258X2100187X:mmc1.docx]

Material Suplementario

Tabla 1. Frecuencia de enfermedades autoinmunies en pacientes con AR

| Variable | RA (n=15) |
| --- | --- |
| Espondiloartritis, n (%) | 0 (0.0) |
| Miopatía inflamatoria, n (%) | 0 (0.0) |
| Esclerosis Sistémica, n (%) | 0 (0.0) |
| Síndrome de Sjögren, n (%) | 8 (53.3) |
| Síndrome antifosfolípido, n (%) | 0 (0.0) |
| Alopecia areata, n (%) | 1 (6.7) |
| Psoriasis, n (%) | 3 (20) |
| Vitiligo, n (%) | 0 (0.0) |
| Diabetes Mellitus tipo I, n (%) | 1 (6.7) |
| Enfermedad de Adison, n (%) | 0 (0.0) |
| Enfermedad de Graves-Basedow, n (%) | 0 (0.0) |
| Tiroiditis de Hashimoto, n (%) | 4 (26.7) |
| Enfermedad Celiaca, n (%) | 0 (0.0) |
| Cirrosis biliar primaria, n (%) | 0 (0.0) |
| Colitis Ulcerosa, n (%) | 0 (0.0) |
| Enfermedad de Chron, n (%) | 0 (0.0) |
| Hepatitis autoinmune, n (%) | 0 (0.0) |
| Esclerosis Múltiple, n (%) | 0 (0.0) |
| Familiar 1 Grado poliautoinmunidad, n (%) | 5 (33.3) |

*Abreviaturas; AR: artritis reumatoide.*
